# Supplementary material for: A quantum chemical study of hydrogen adsorption on carbon-supported palladium clusters
Source: Royal Society of Chemistry journal article supplement (doi:10.1039/c9cp04606b), 2019-01-01
Supplement: c9cp04606b1.pdf [file c9cp04606b1.pdf]

Supporting information for:  
Quantum chemical study of hydrogen adsorption on  
carbon-supported palladium clusters

Lisa Warczinski\*, Christof Hättig\*

July 31, 2019

---

\*Lehrstuhl für Theoretische Chemie, Ruhr-Universität Bochum, 44780 Bochum, Germany

**Comparison of three different functionals for the hydrogen adsorption energy on free Pd<sub>6</sub>**

| functional | $\Delta E_{\text{ads}}$ in kJ/mol |
|------------|-----------------------------------|
| TPSS       | -49.2                             |
| PBE        | -63.4                             |
| BP86       | -61.0                             |

**Comparison of two different basis sets for the hydrogen adsorption energy on free Pd<sub>6</sub>**

| basis set | $\Delta E_{\text{ads}}$ in kJ/mol |
|-----------|-----------------------------------|
| def2-SVP  | -49.2                             |
| def2-TZVP | -38.2                             |

**Comparison of three different functionals for the incremental adsorption energies for an increasing number of H<sub>2</sub> molecules on free Pd<sub>6</sub> in kJ/mol**

| number of H <sub>2</sub> | TPSS  | PBE    | BP86   |
|--------------------------|-------|--------|--------|
| 1                        | -49.2 | -70.5  | -60.4  |
| 2                        | -43.8 | -65.5  | -54.8  |
| 3                        | -43.7 | -68.2  | -56.5  |
| 4                        | -37.8 | -59.2  | -48.2  |
| 5                        | -33.7 | -54.8  | -43.4  |
| 6                        | -24.2 | -41.6  | -29.8  |
| 7                        | -64.8 | -112.7 | -103.3 |

**Comparison of two different basis sets for the incremental adsorption energies for an increasing number of H<sub>2</sub> molecules on free Pd<sub>6</sub> in kJ/mol**

| number of H <sub>2</sub> | def2-SVP | def2-TZVP |
|--------------------------|----------|-----------|
| 1                        | -49.2    | -59.6     |
| 2                        | -43.8    | -41.4     |
| 3                        | -43.7    | -49.8     |
| 4                        | -37.8    | -54.6     |
| 5                        | -33.7    | -39.8     |
| 6                        | -24.2    | -31.8     |
| 7                        | -64.8    | -64.0     |

**Comparison of two different functionals for the dispersion contribution to the metal-support interactions in the Pd<sub>6</sub> system**

| functional | total binding energy in kJ/mol | dispersion contribution in kJ/mol |
|------------|--------------------------------|-----------------------------------|
| TPSS       | 195.7                          | 95.0                              |
| PBE        | 172.9                          | 70.3                              |

**Comparison of two different functionals for the dispersion contribution to the metal-support interactions in the Pd<sub>21</sub> system**

| functional | total binding energy in kJ/mol | dispersion contribution in kJ/mol |
|------------|--------------------------------|-----------------------------------|
| TPSS       | 549.7                          | 301.5                             |
| PBE        | 451.0                          | 220.0                             |
